# Supplementary material for: Loss of RASGRP1 in humans impairs T‐cell expansion leading to Epstein‐Barr virus susceptibility
Source: PubMed Central journal article supplement (PMC5801500; doi:10.15252/emmm.201708292), 2018-01-08
Supplement: EMMM-10-188-s001.pdf [file EMMM-10-188-s001.pdf]

## Expanded View Figures

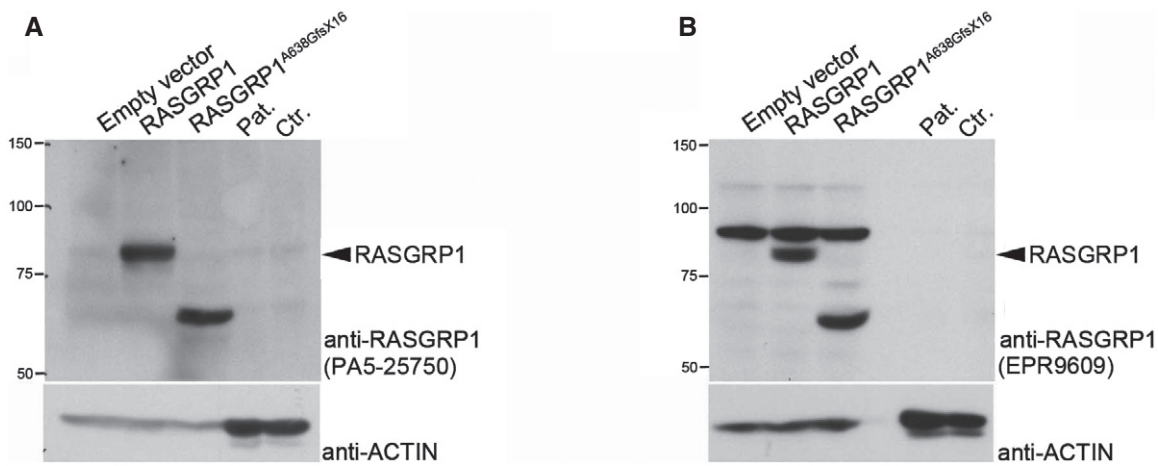

**Figure EV1. RASGRP1 expression is not detected in T-cell blasts with the anti-RASGRP1 antibodies PA5-25750 and EPR9609.**

Comparison of RASGRP1 expression in T-cell blasts of a healthy control (Ctr.) and P1.1 (Pat.) and in HEK293T cells transfected with empty vector, WT-RASGRP1 or RASGRP1<sup>A638GfsX16</sup>.

A RASGRP1 detection using the anti-RASGRP1 antibody PA5-25750. Actin was used as a loading control. Detection of RASGRP1 required long exposure (1 h to overnight).  
 B RASGRP1 detection using the anti-RASGRP1 antibody EPR9609. Actin was used as a loading control. Detection of RASGRP1 required long exposure (1 h to overnight).

Data information: One representative of three independent experiments.

Source data are available online for this figure.

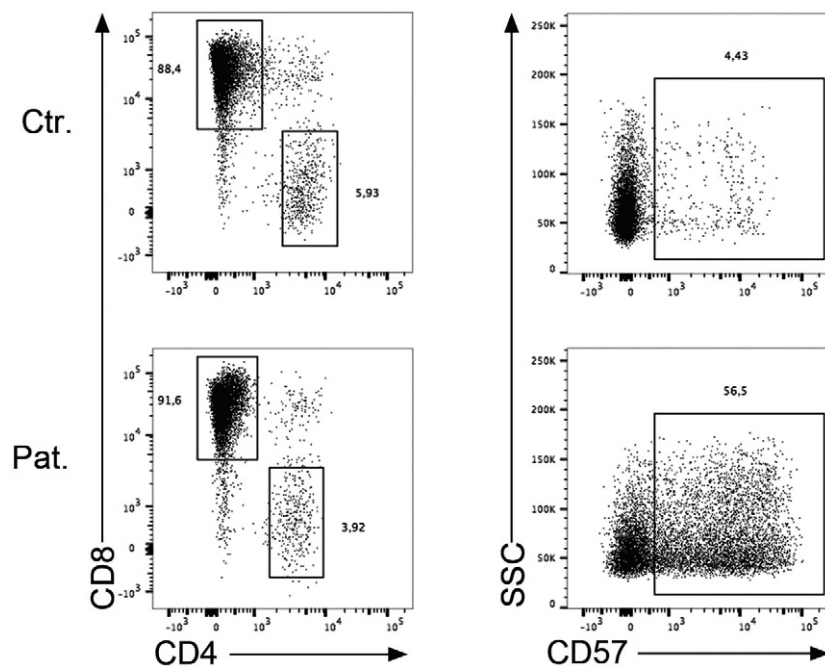

**Figure EV2. Accumulation of CD57<sup>+</sup> senescent T cells in RASGRP1-deficient T-cell blasts after 12–15 days of culture.**

Left panel: Dot plots showing the staining of CD4 and CD8 on T-cell blasts at day 20 of culture from a healthy control (Ctr.) and P1.1 (Pat.). Right panel: Dot plots showing the staining for CD57 and the SSC gated on CD8-positive cells. One representative experiment of four cultures from different blood samples.

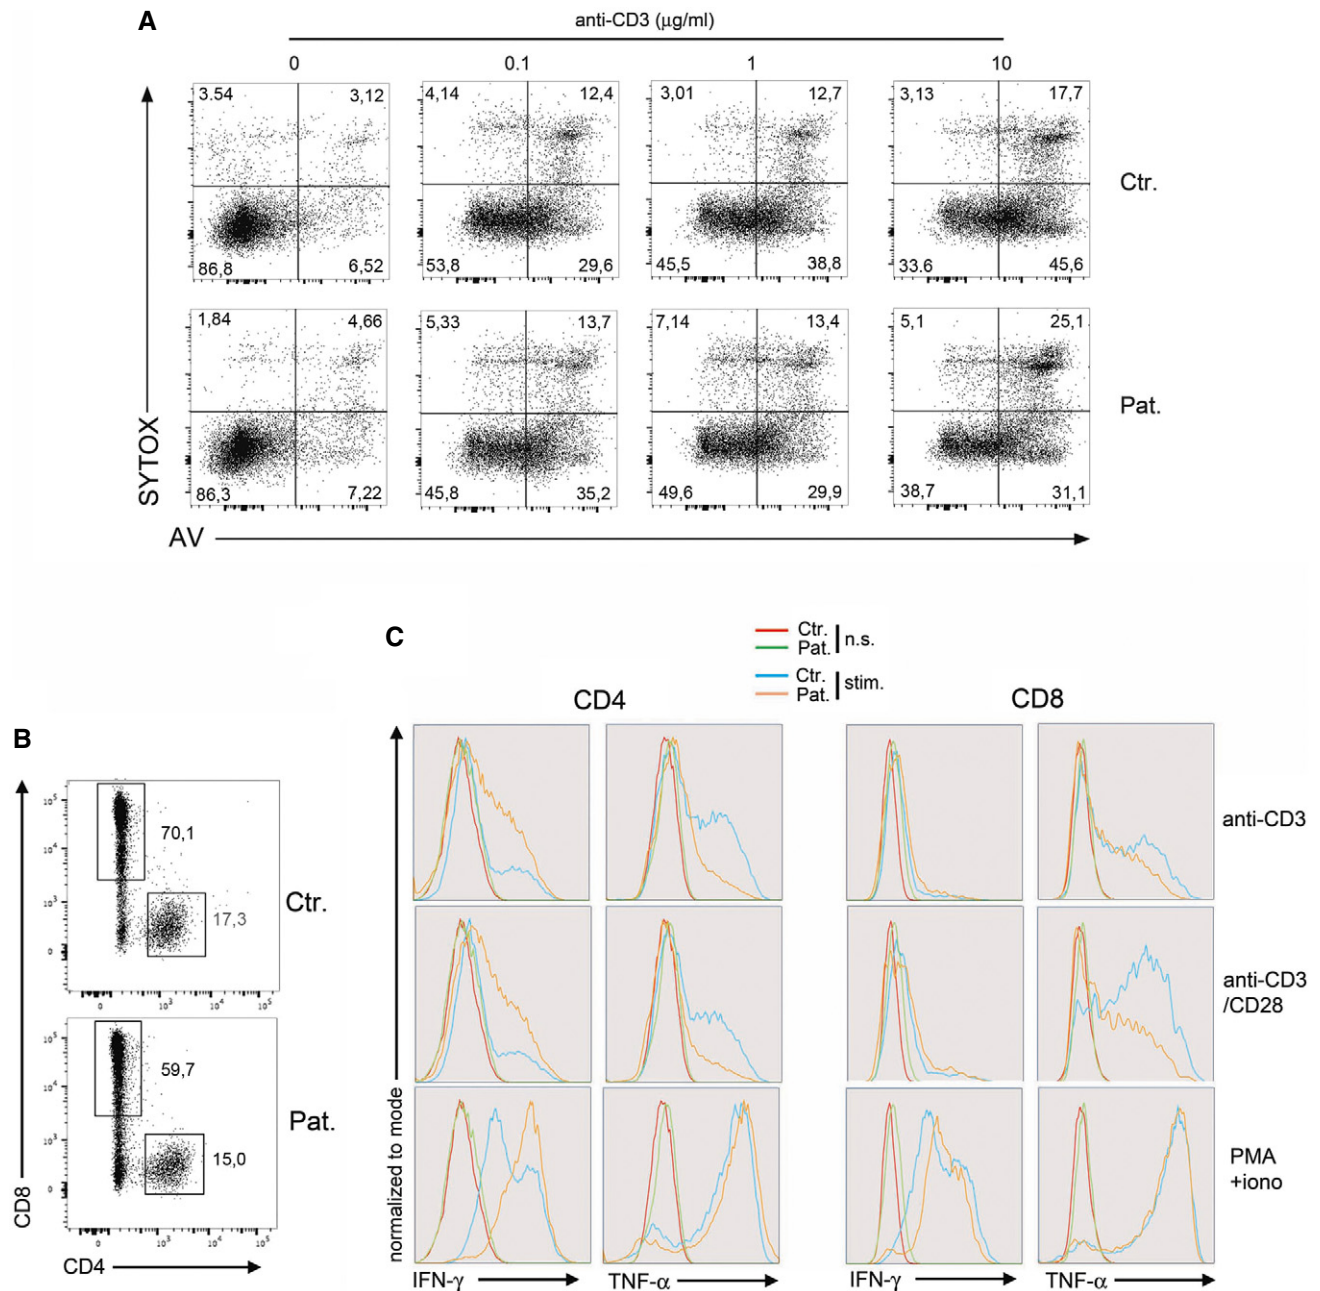

**Figure EV3. Activation-induced cell death and cytokine production of T-cell blasts from patient P1.1.**

- A** Normal activation-induced cell death (AICD) in RASGRP1-deficient T cells. Representative dot plots showing apoptotic cells of a healthy control (Ctr.) and P1.1 (Pat.) detected by Annexin V (AV) and SYTOX staining after stimulation with the indicated concentration of anti-CD3 antibody for 12 h. Apoptotic and necrotic cells correspond to SYTOX<sup>-</sup>AV<sup>+</sup> and SYTOX<sup>+</sup>AV<sup>+</sup>, respectively. One representative of two independent experiments.
- B, C** Intracellular TNF- $\alpha$  and IFN- $\gamma$  production in RASGRP1-deficient T-cell blasts. (B) Dot plots of CD8 and CD4 staining on gated CD3<sup>+</sup> T-cell blasts for cytokine production. (C) FACS histograms of intracellular IFN- $\gamma$  and TNF- $\alpha$  production on gated CD4<sup>+</sup> or CD8<sup>+</sup> T-cell blasts of a control donor (Ctr.) and P1.1 (Pat.) stimulated (stim.) or not (n.s.) for 12 h with coated anti-CD3 antibody, anti-CD3+CD28 beads, and PMA+ionomycin. One representative of two independent experiments.

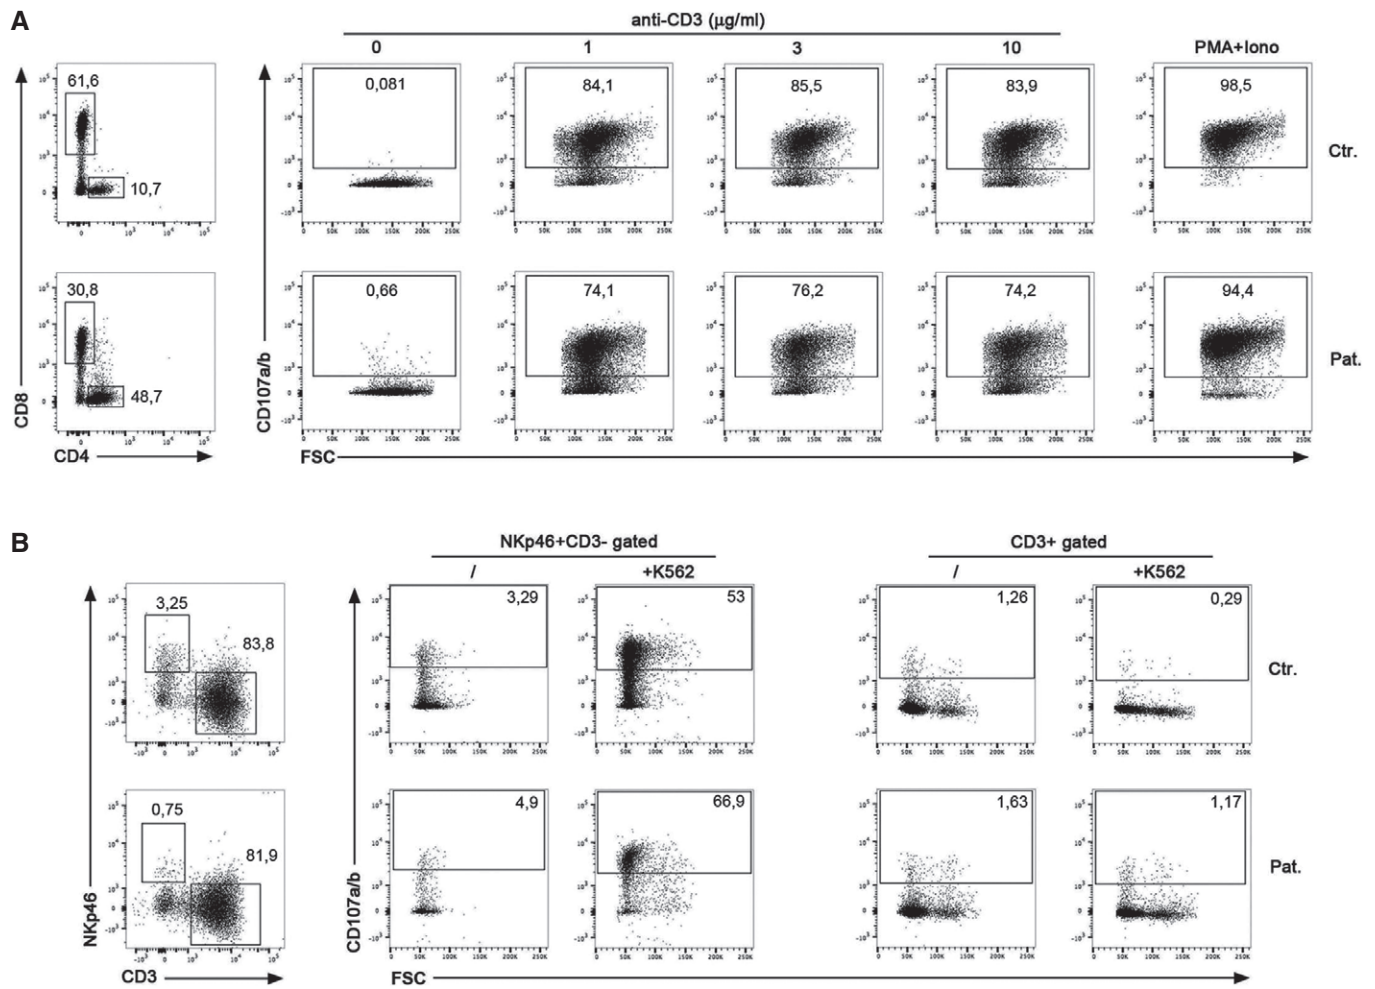

**Figure EV4. Degranulation of RASGRP1-deficient CD8<sup>+</sup> T and NK cells.**

A Representative dot plots showing the cell-surface expression of CD107a/b on gated CD8<sup>+</sup> T-cell blasts of a healthy control (Ctr.) and P1.1 (Pat.) that have been stimulated for 3 h with incremental doses of coated anti-CD3 antibody or PMA+ionomycin. One representative of three independent experiments.

B Representative dot plots showing the cell-surface expression of CD107a/b on gated NKp46<sup>+</sup>CD3<sup>-</sup> cells corresponding to NK cells or CD3<sup>+</sup> cells of a healthy control (Ctr.) and P1.1 (Pat.) that have been stimulated for 3 h in the presence or not of K562 target cells. One representative of two independent experiments.

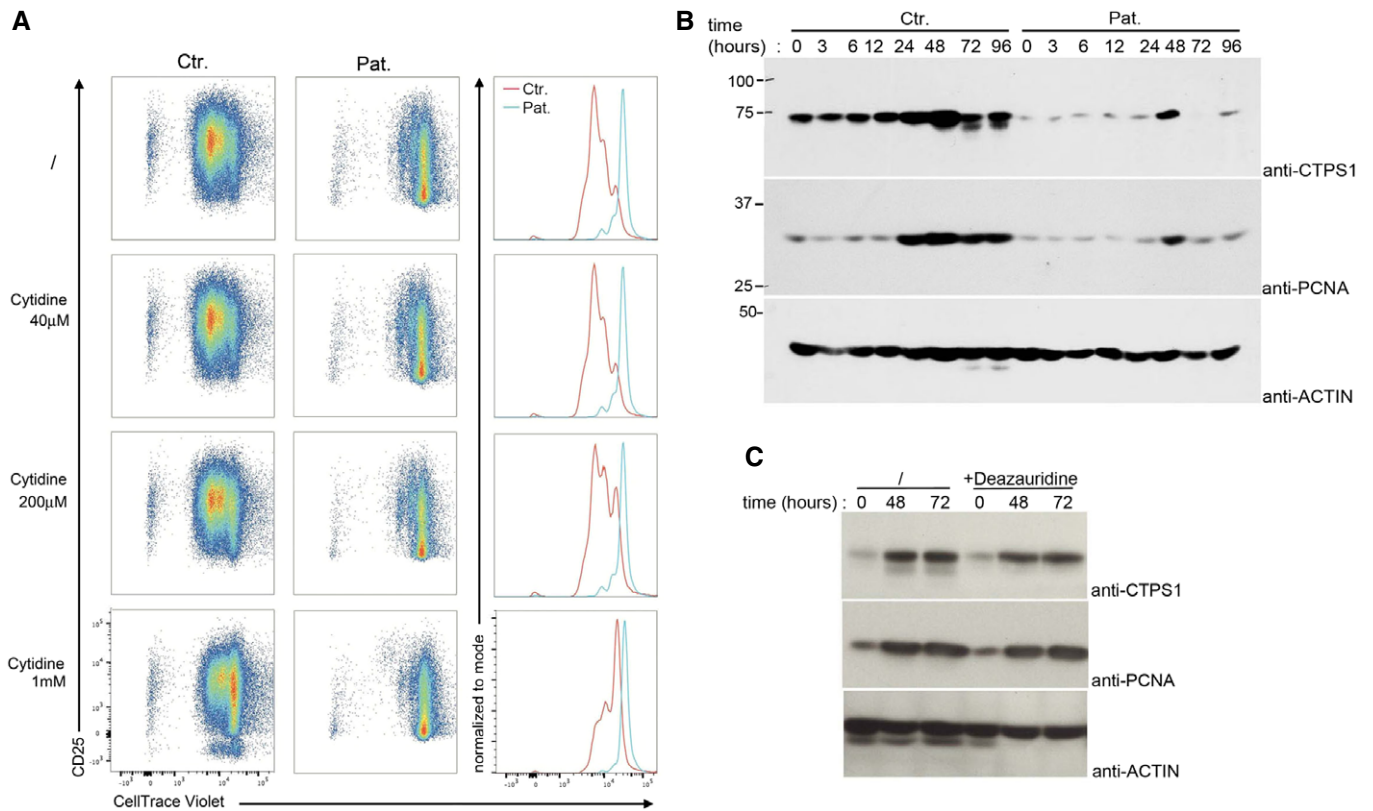

**Figure EV5. Cytidine complementation of RASGRP1-deficient T-cell blasts and defect in PCNA expression in activated RASGRP1-deficient T cells.**

**A** Cytidine complementation does not restore proliferation of RASGRP1 deficient T-cell blasts. Representative dot plots showing cell divisions by dilution of the CellTrace violet dye and expression of CD25 of control donor (Ctr.) or P1.1 (Pat.) T-cell blasts stimulated with anti-CD3 antibody in a medium containing no (*l*) or various concentrations of cytidine (40  $\mu$ M, 200  $\mu$ M, or 1 mM). Each peak of the histograms corresponds to a cell division. Right panels represent histograms from the dot plots of patient and control that have been overlaid. Data are representative of one of two independent experiments.

**B** Immunoblots for CTPS1 and PCNA expression of control donor (Ctr.) and P1.1 T-cell blasts (Pat.) stimulated with anti-CD3/CD28 antibodies for different periods of time. Actin was used as a loading control. One representative of two independent experiments from different blood samples.

**C** Control donor T-cell blasts stimulated or not for various periods of times with anti-CD3/CD28 beads in the presence or not (*l*) of 40  $\mu$ M of deazauridine. Immunoblots of CTPS1 and PCNA expression. Actin was used as a loading control. One representative of two independent experiments from different blood samples.

Source data are available online for this figure.
