# Supplementary material for: Loss of RASGRP1 in humans impairs T‐cell expansion leading to Epstein‐Barr virus susceptibility
Source: PubMed Central journal article supplement (PMC5801500; doi:10.15252/emmm.201708292), 2018-01-08

Figure 1 Panel F Upper Right anti-RASGRP1

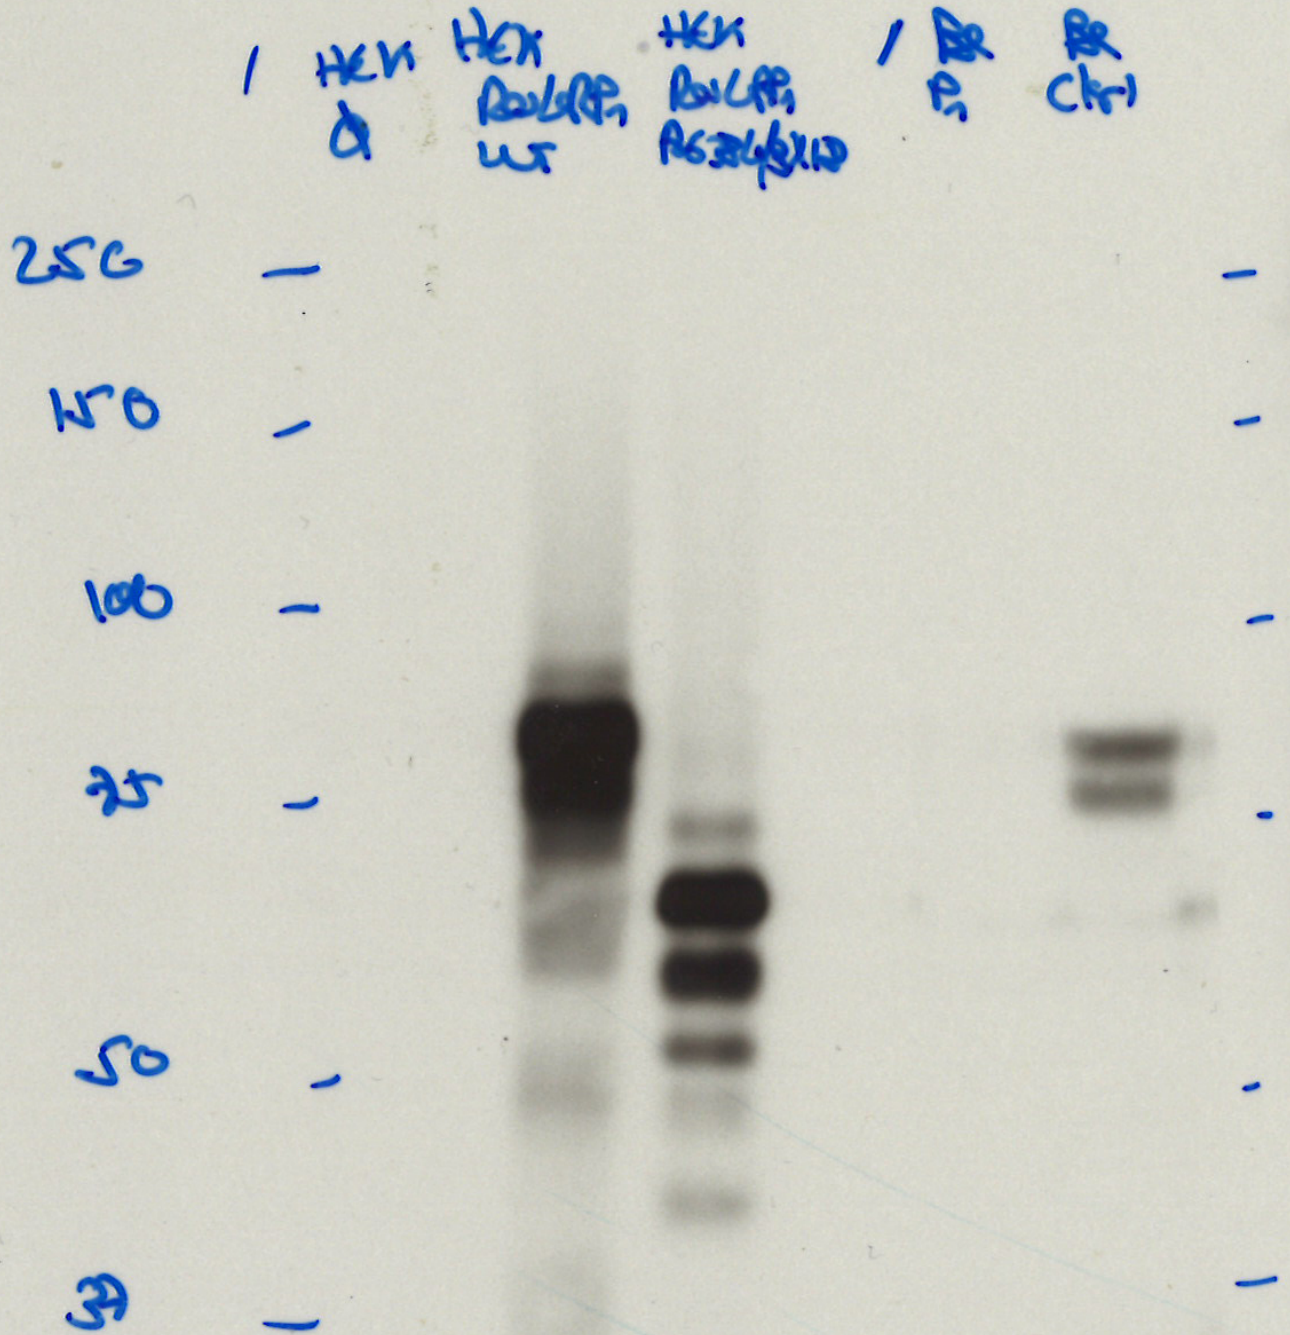

Figure 1 Panel F Lower right anti-ACTIN

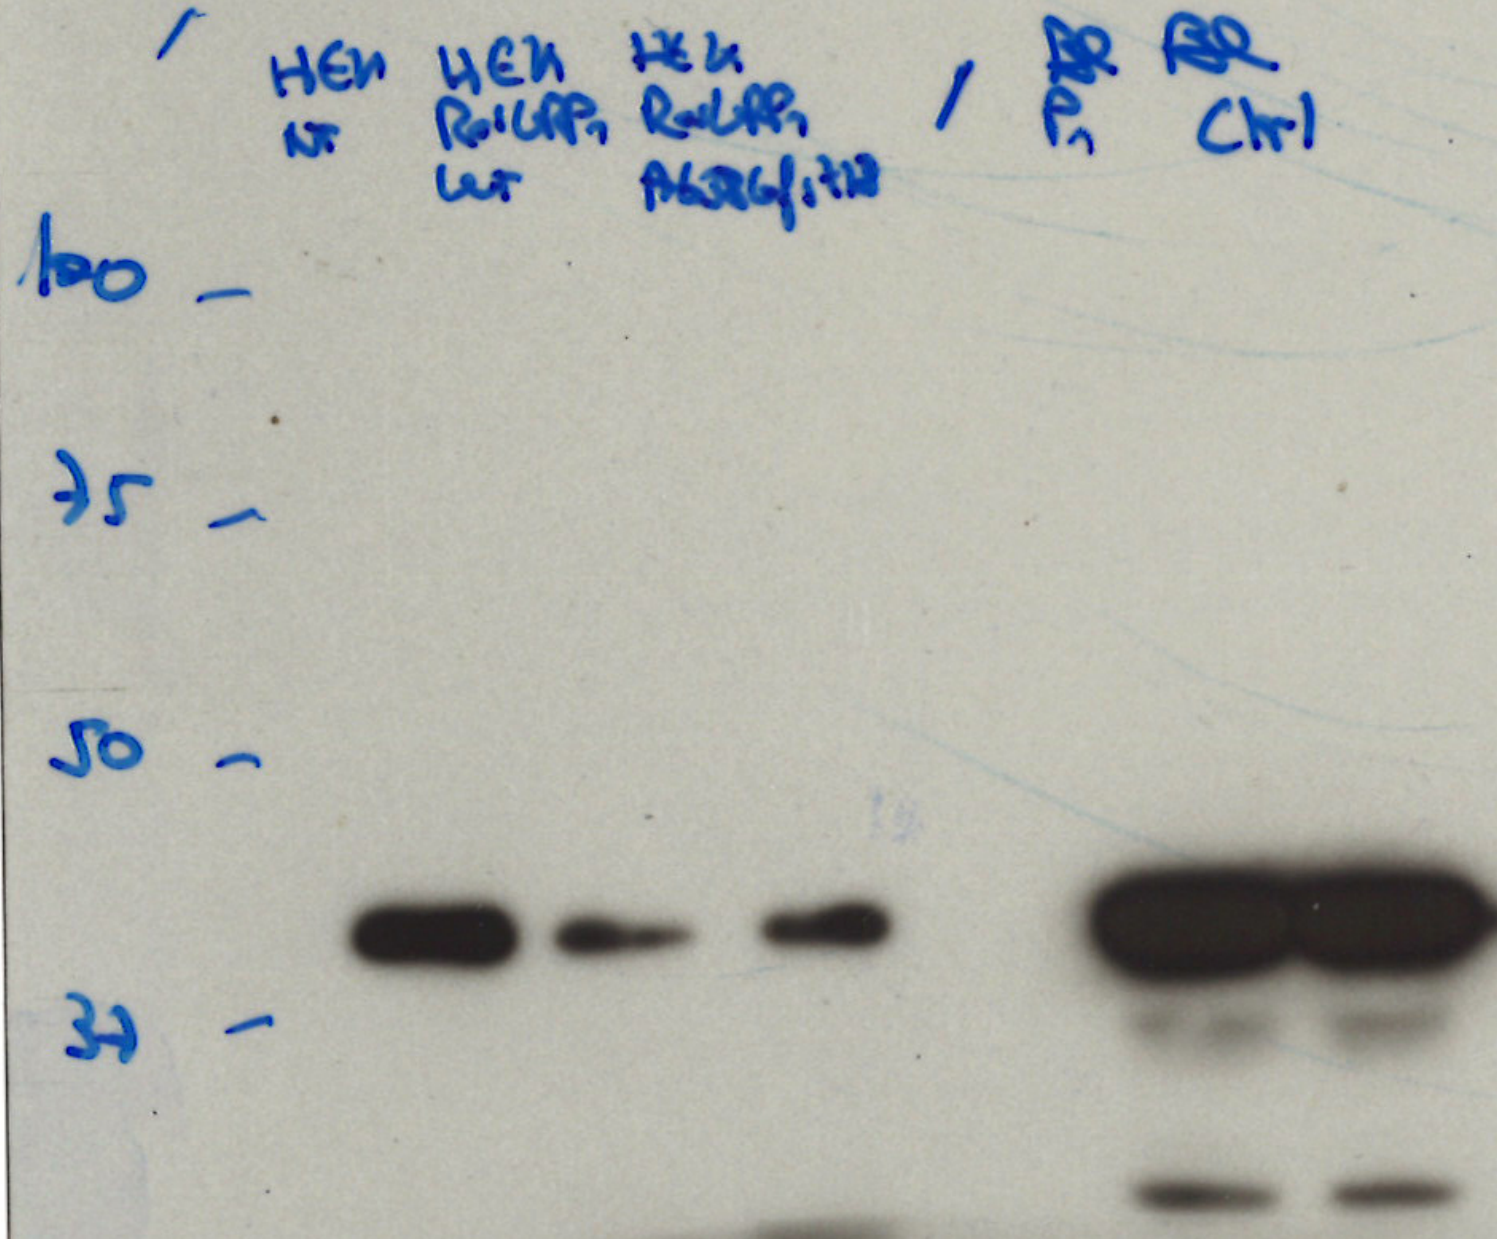

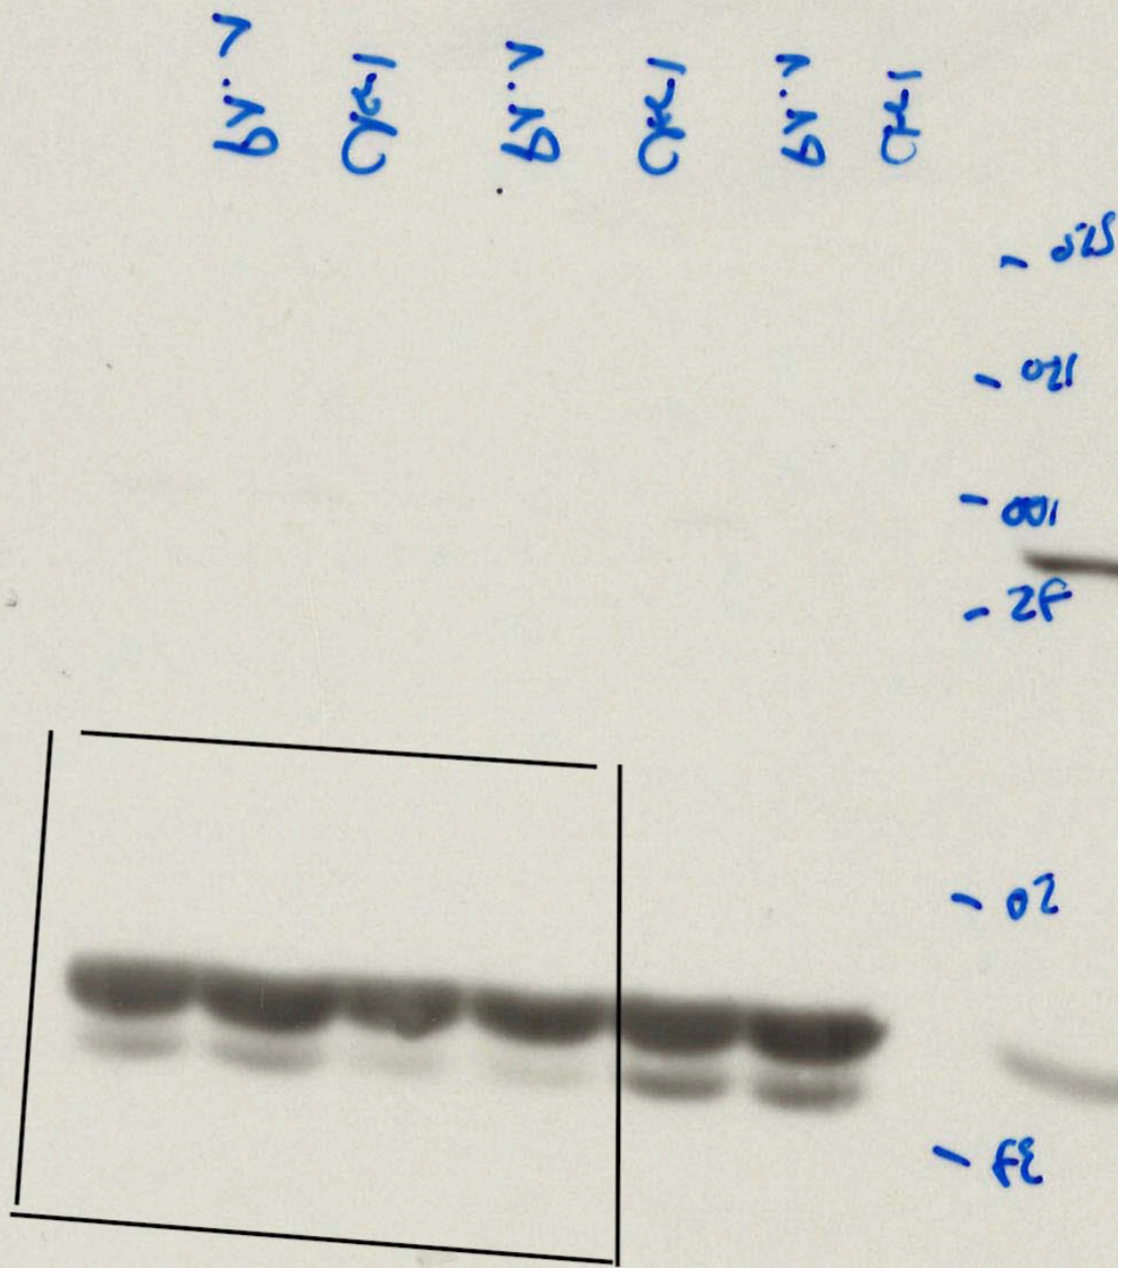

Figure 1 Panel F lower anti-ACTIN

Figure 1 Panel F upper left anti-RASGRP1

Ctrl P<sub>122</sub> Ctrl P<sub>122</sub> Ctrl P<sub>122</sub>

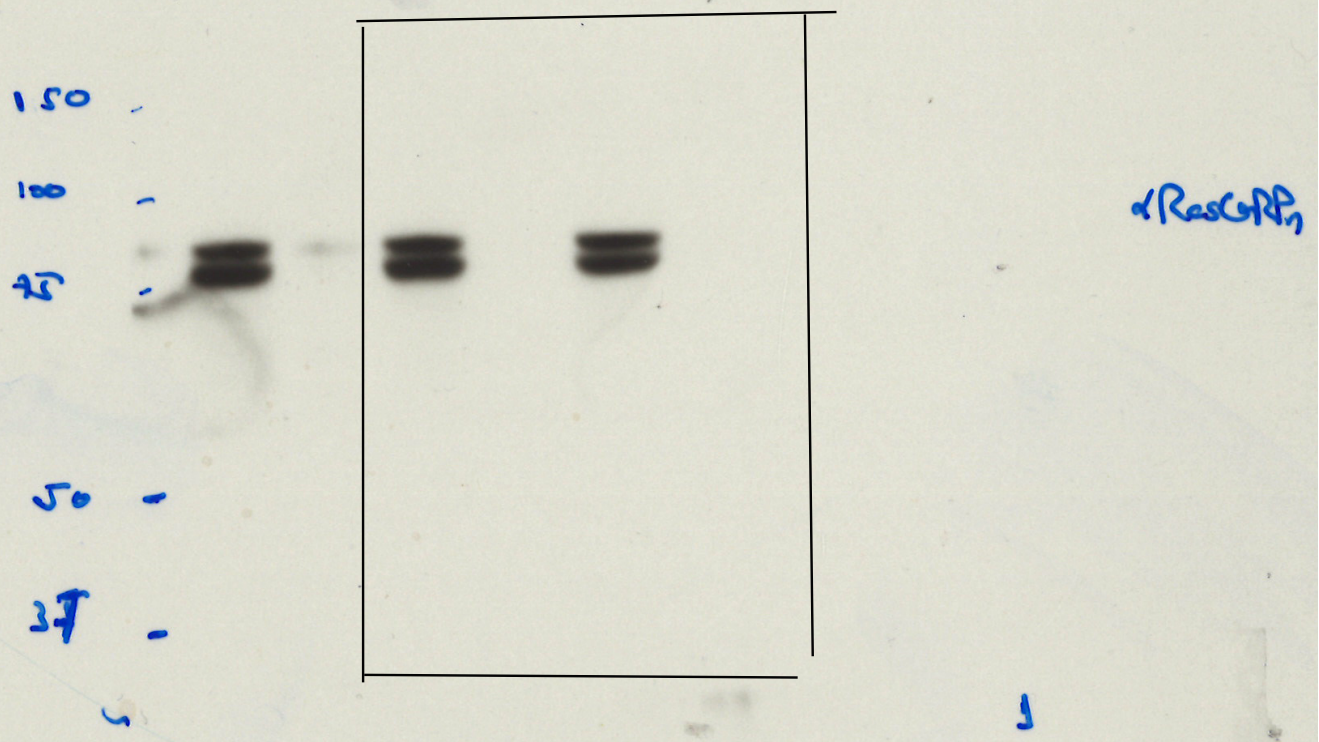

Supplement: EMMM-10-188-s002.pdf [file EMMM-10-188-s002.pdf]
