# Supplementary material for: Loss of RASGRP1 in humans impairs T‐cell expansion leading to Epstein‐Barr virus susceptibility
Source: PubMed Central journal article supplement (PMC5801500; doi:10.15252/emmm.201708292), 2018-01-08

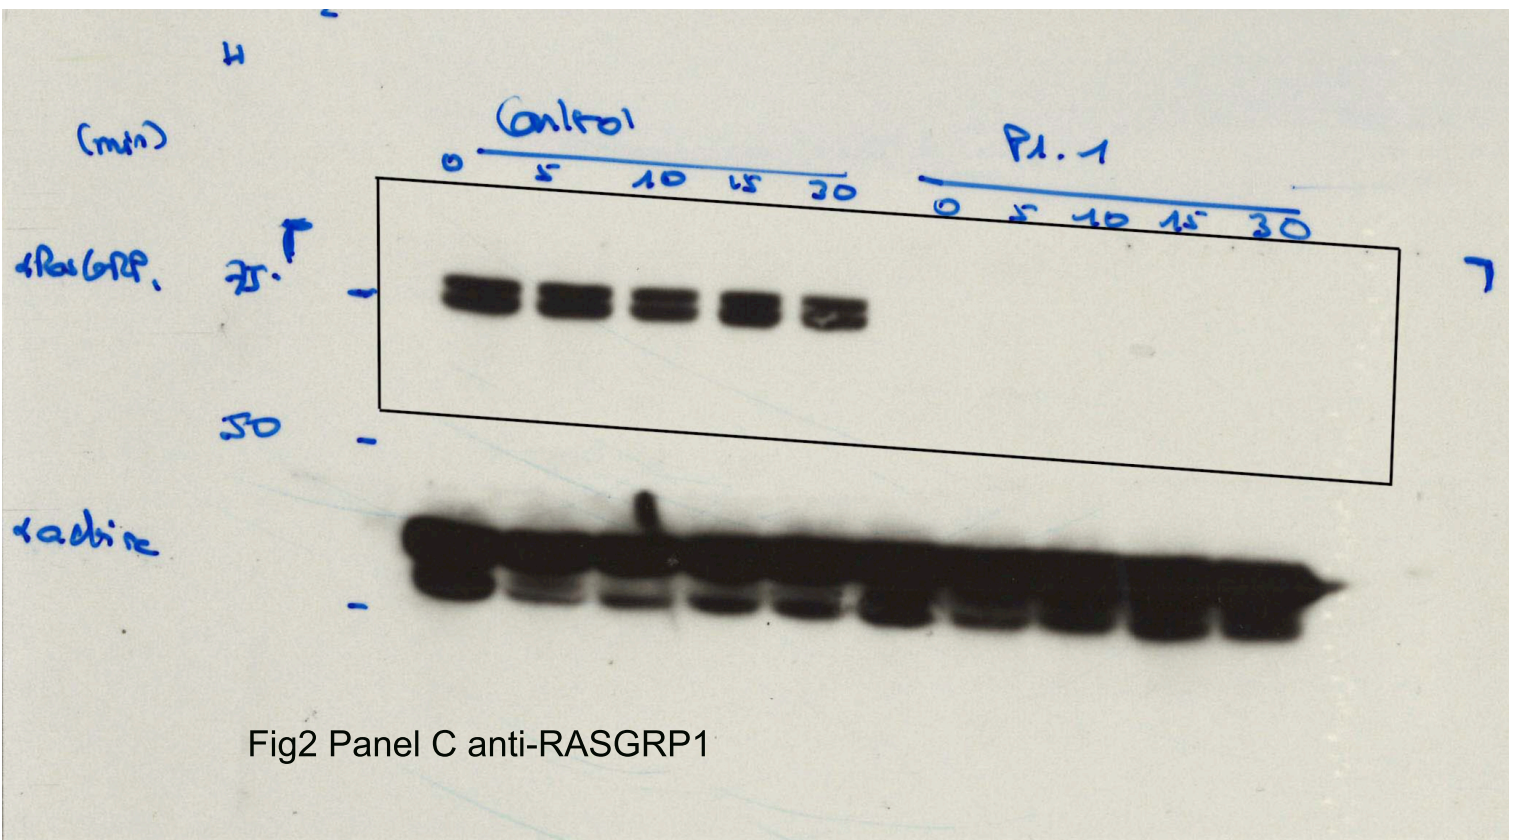

Fig2 Panel C anti-RASGRP1

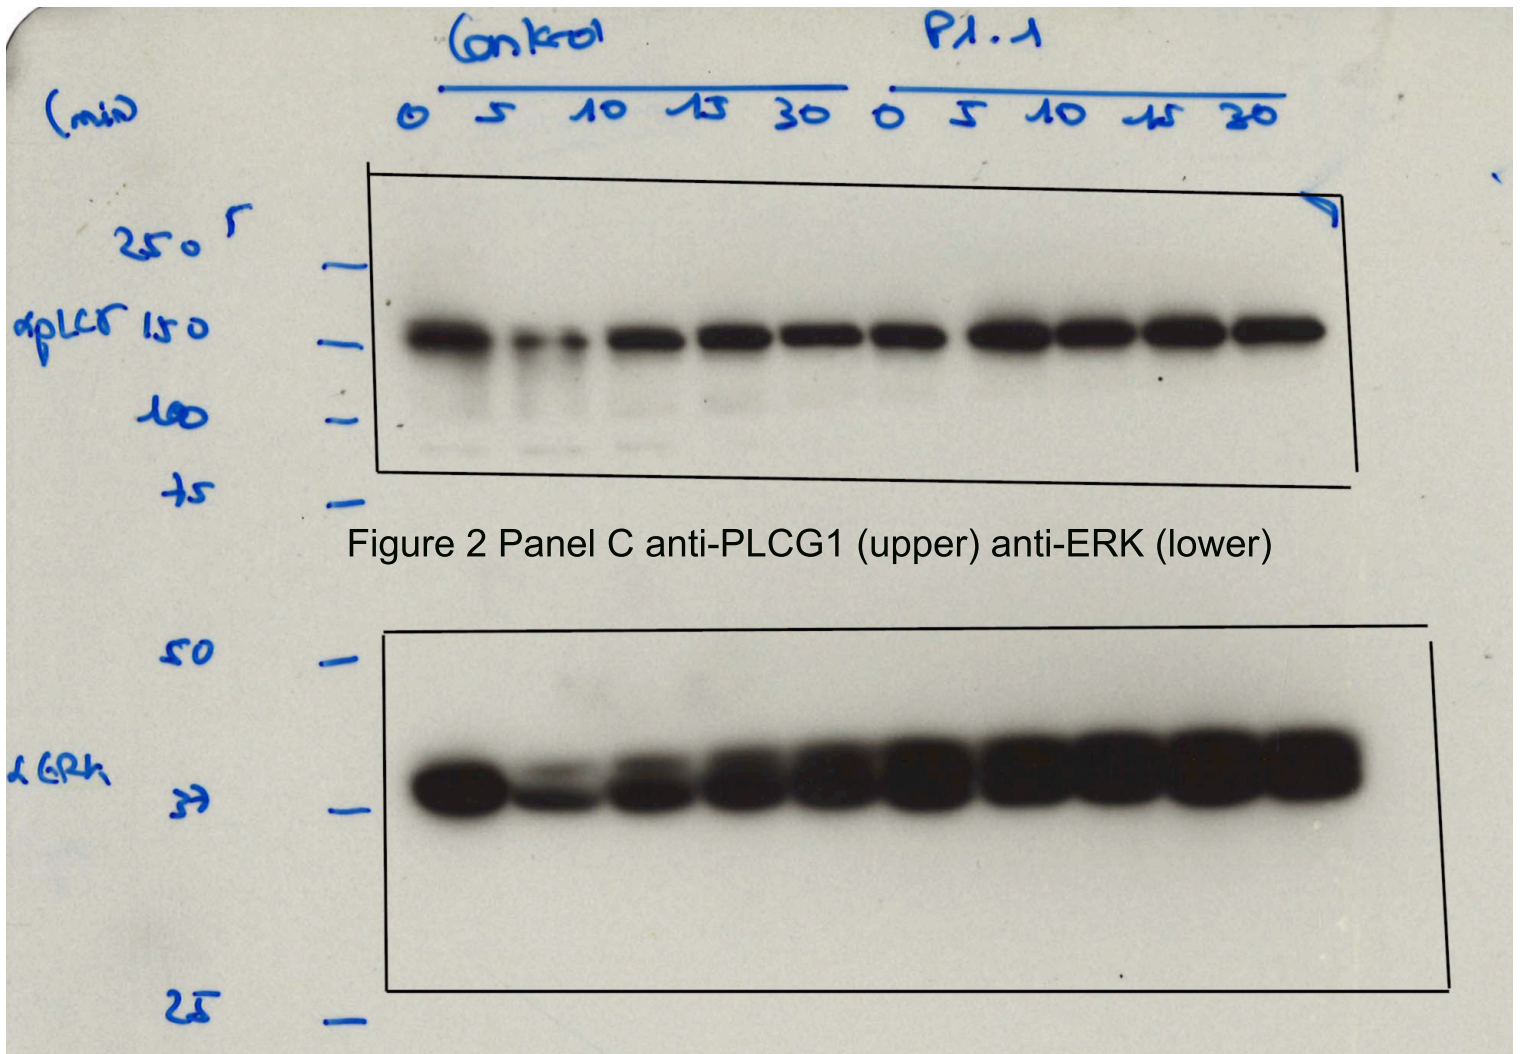

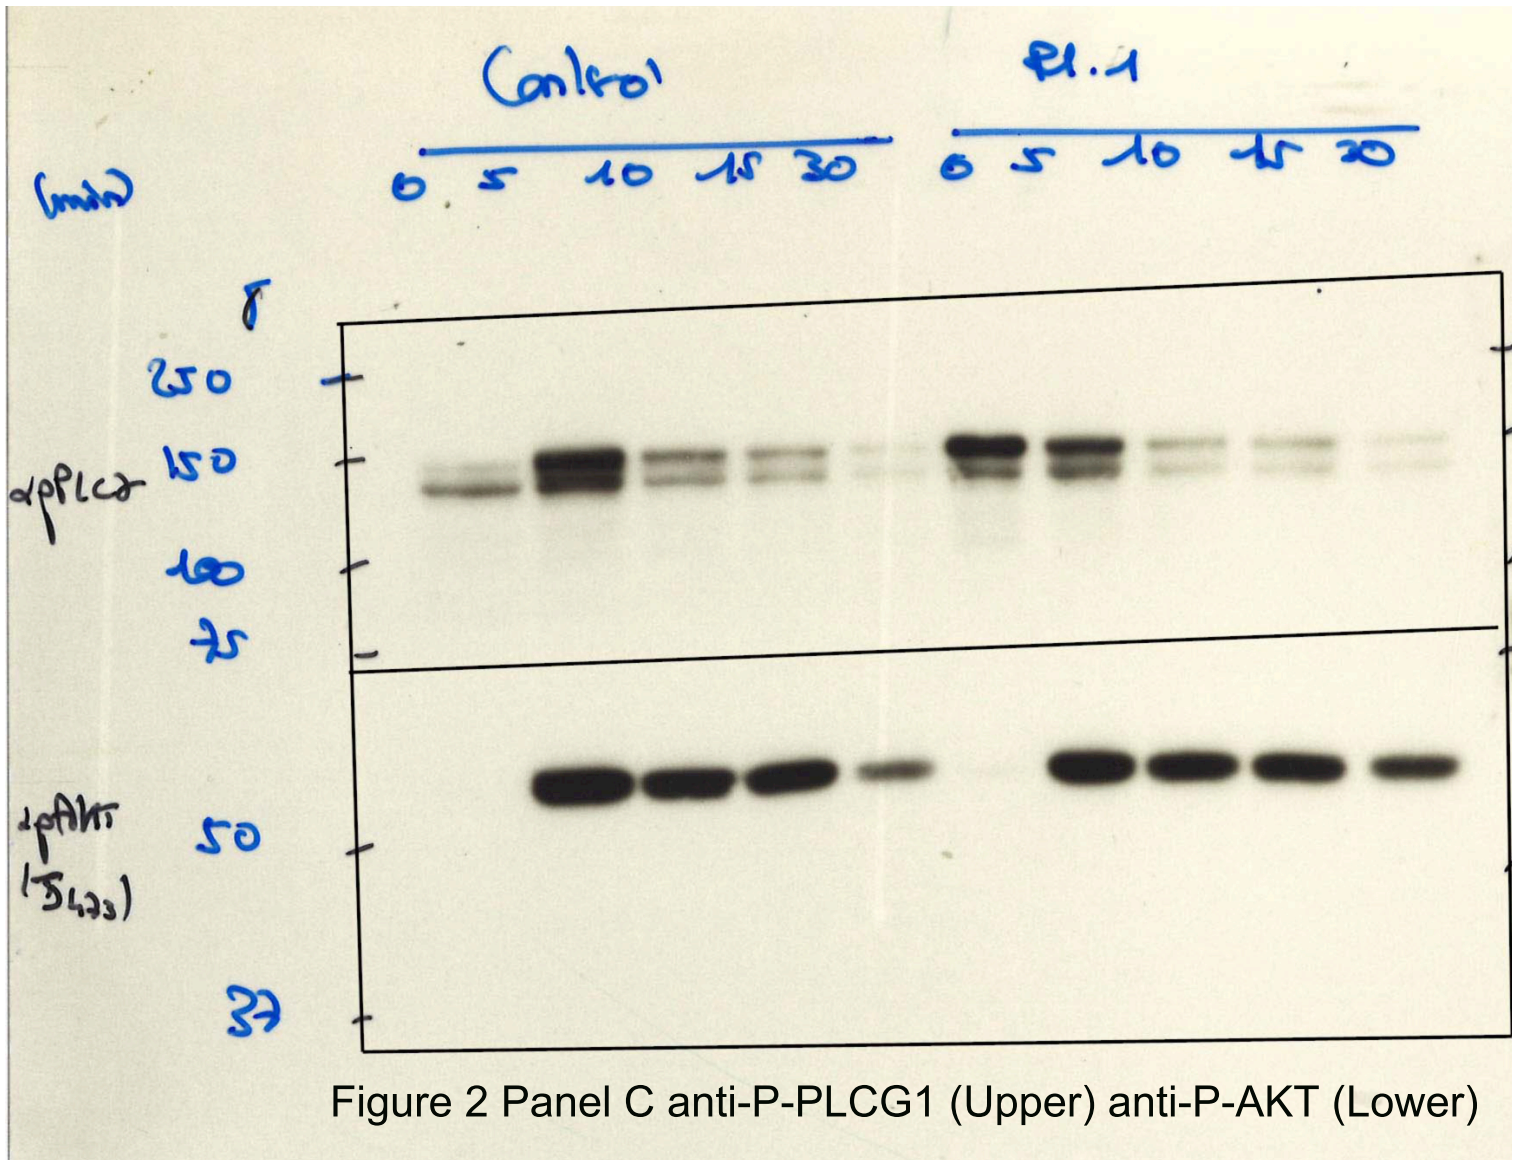

Figure 2 Panel C anti-P-ERK

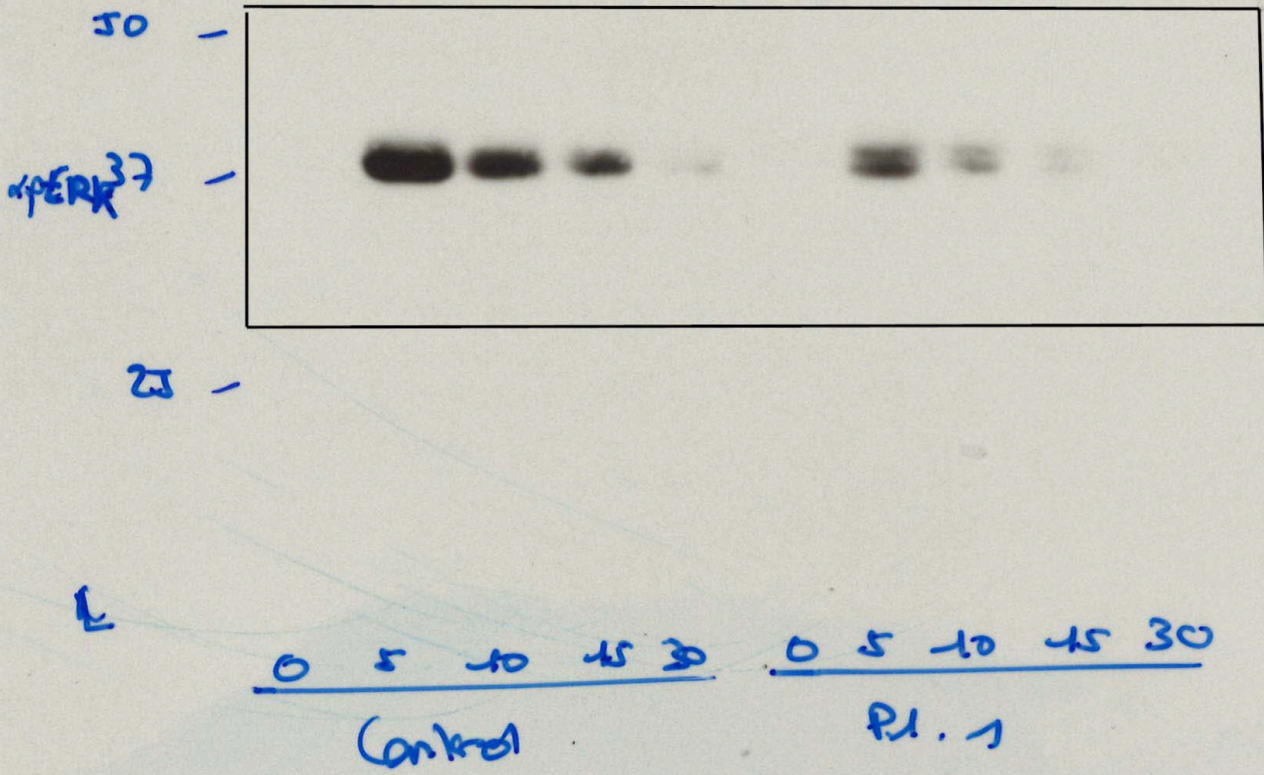

Figure 2 Panel C anti-P-p38

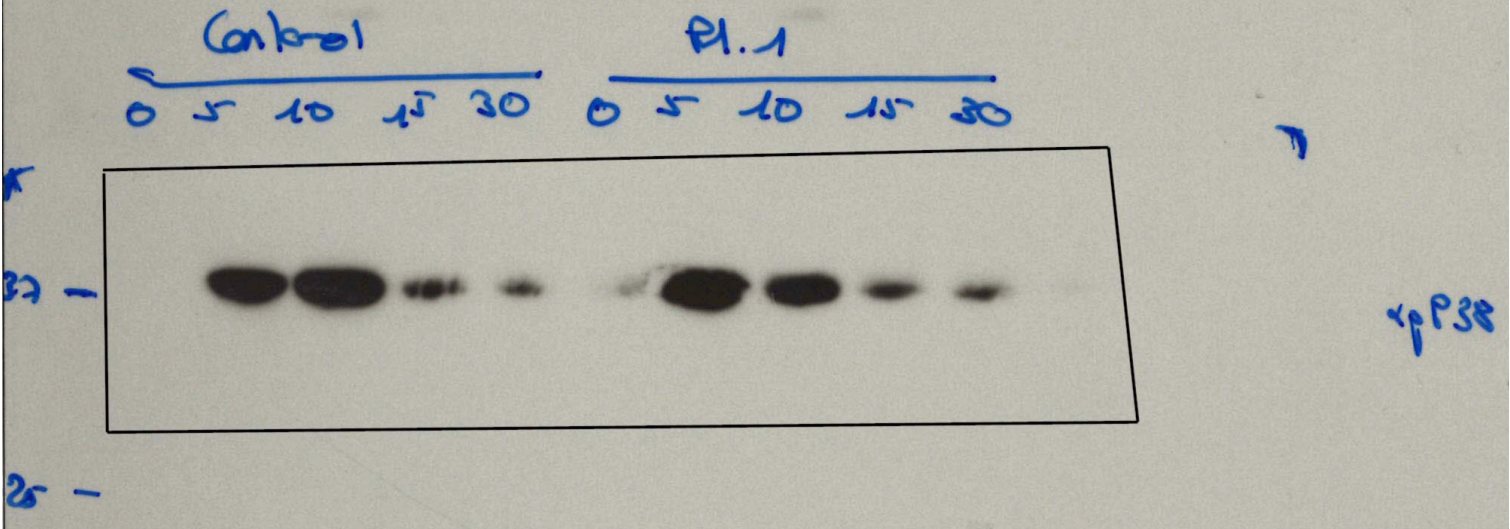

Figure 2 Panel C anti-ACTIN

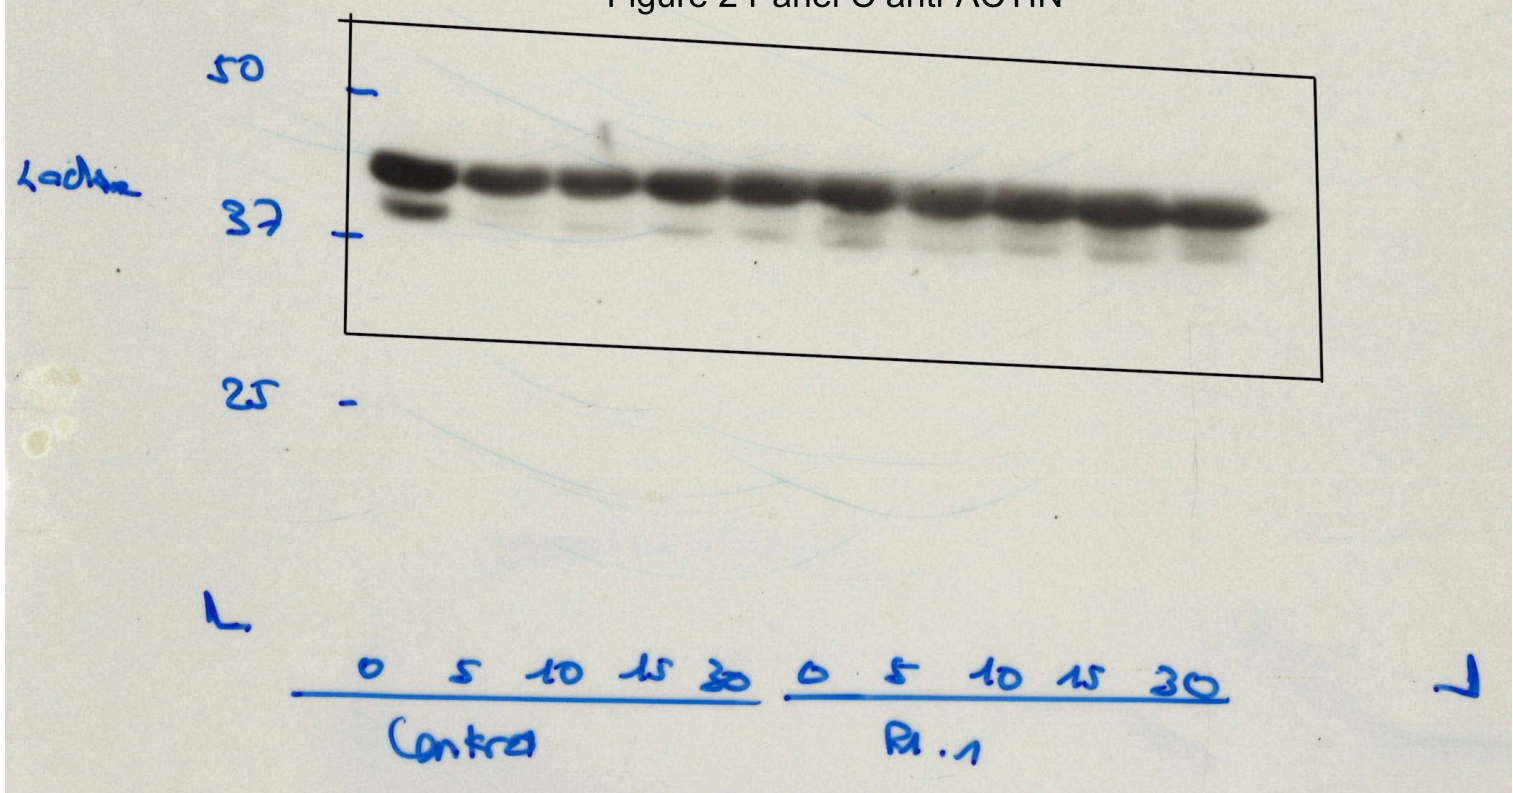

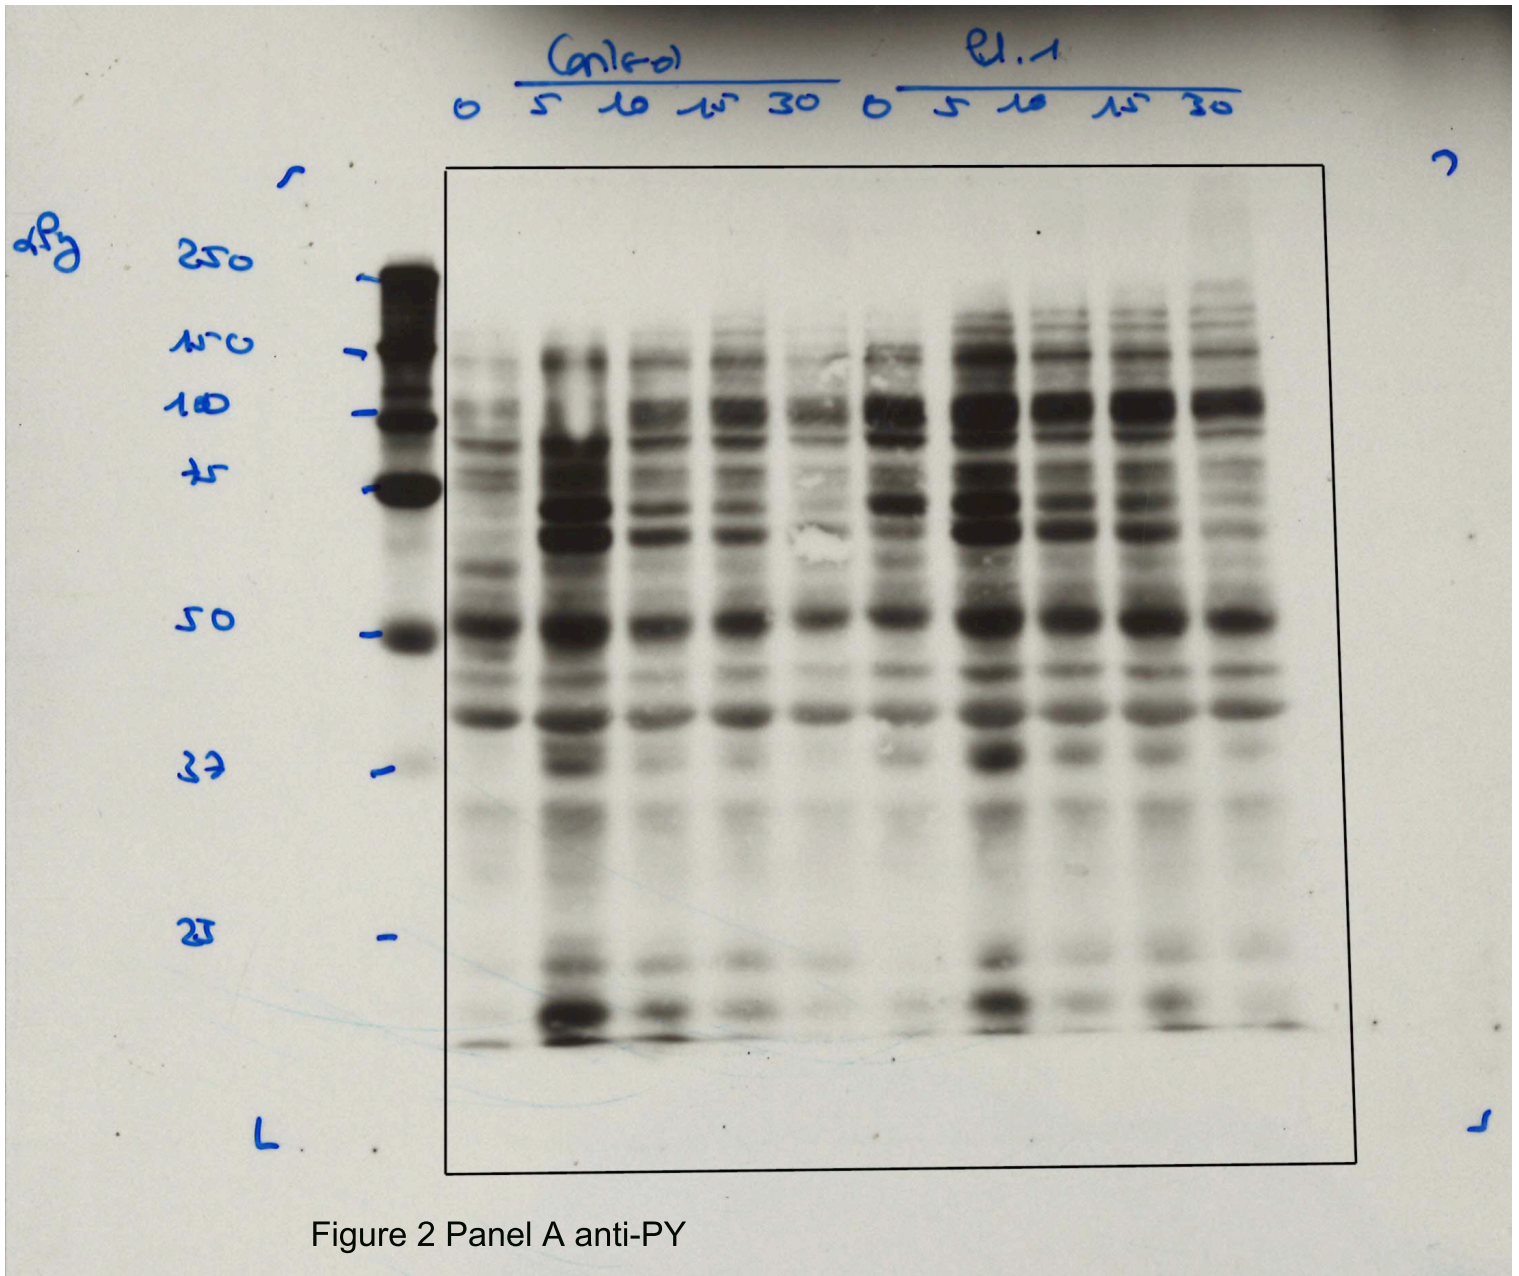

Supplement: EMMM-10-188-s003.pdf [file EMMM-10-188-s003.pdf]
