# Supplementary material for: Loss of RASGRP1 in humans impairs T‐cell expansion leading to Epstein‐Barr virus susceptibility
Source: PubMed Central journal article supplement (PMC5801500; doi:10.15252/emmm.201708292), 2018-01-08

Figure 5 Panel A anti-RASGRP1 (upper)  
anti-ACTIN (lower)

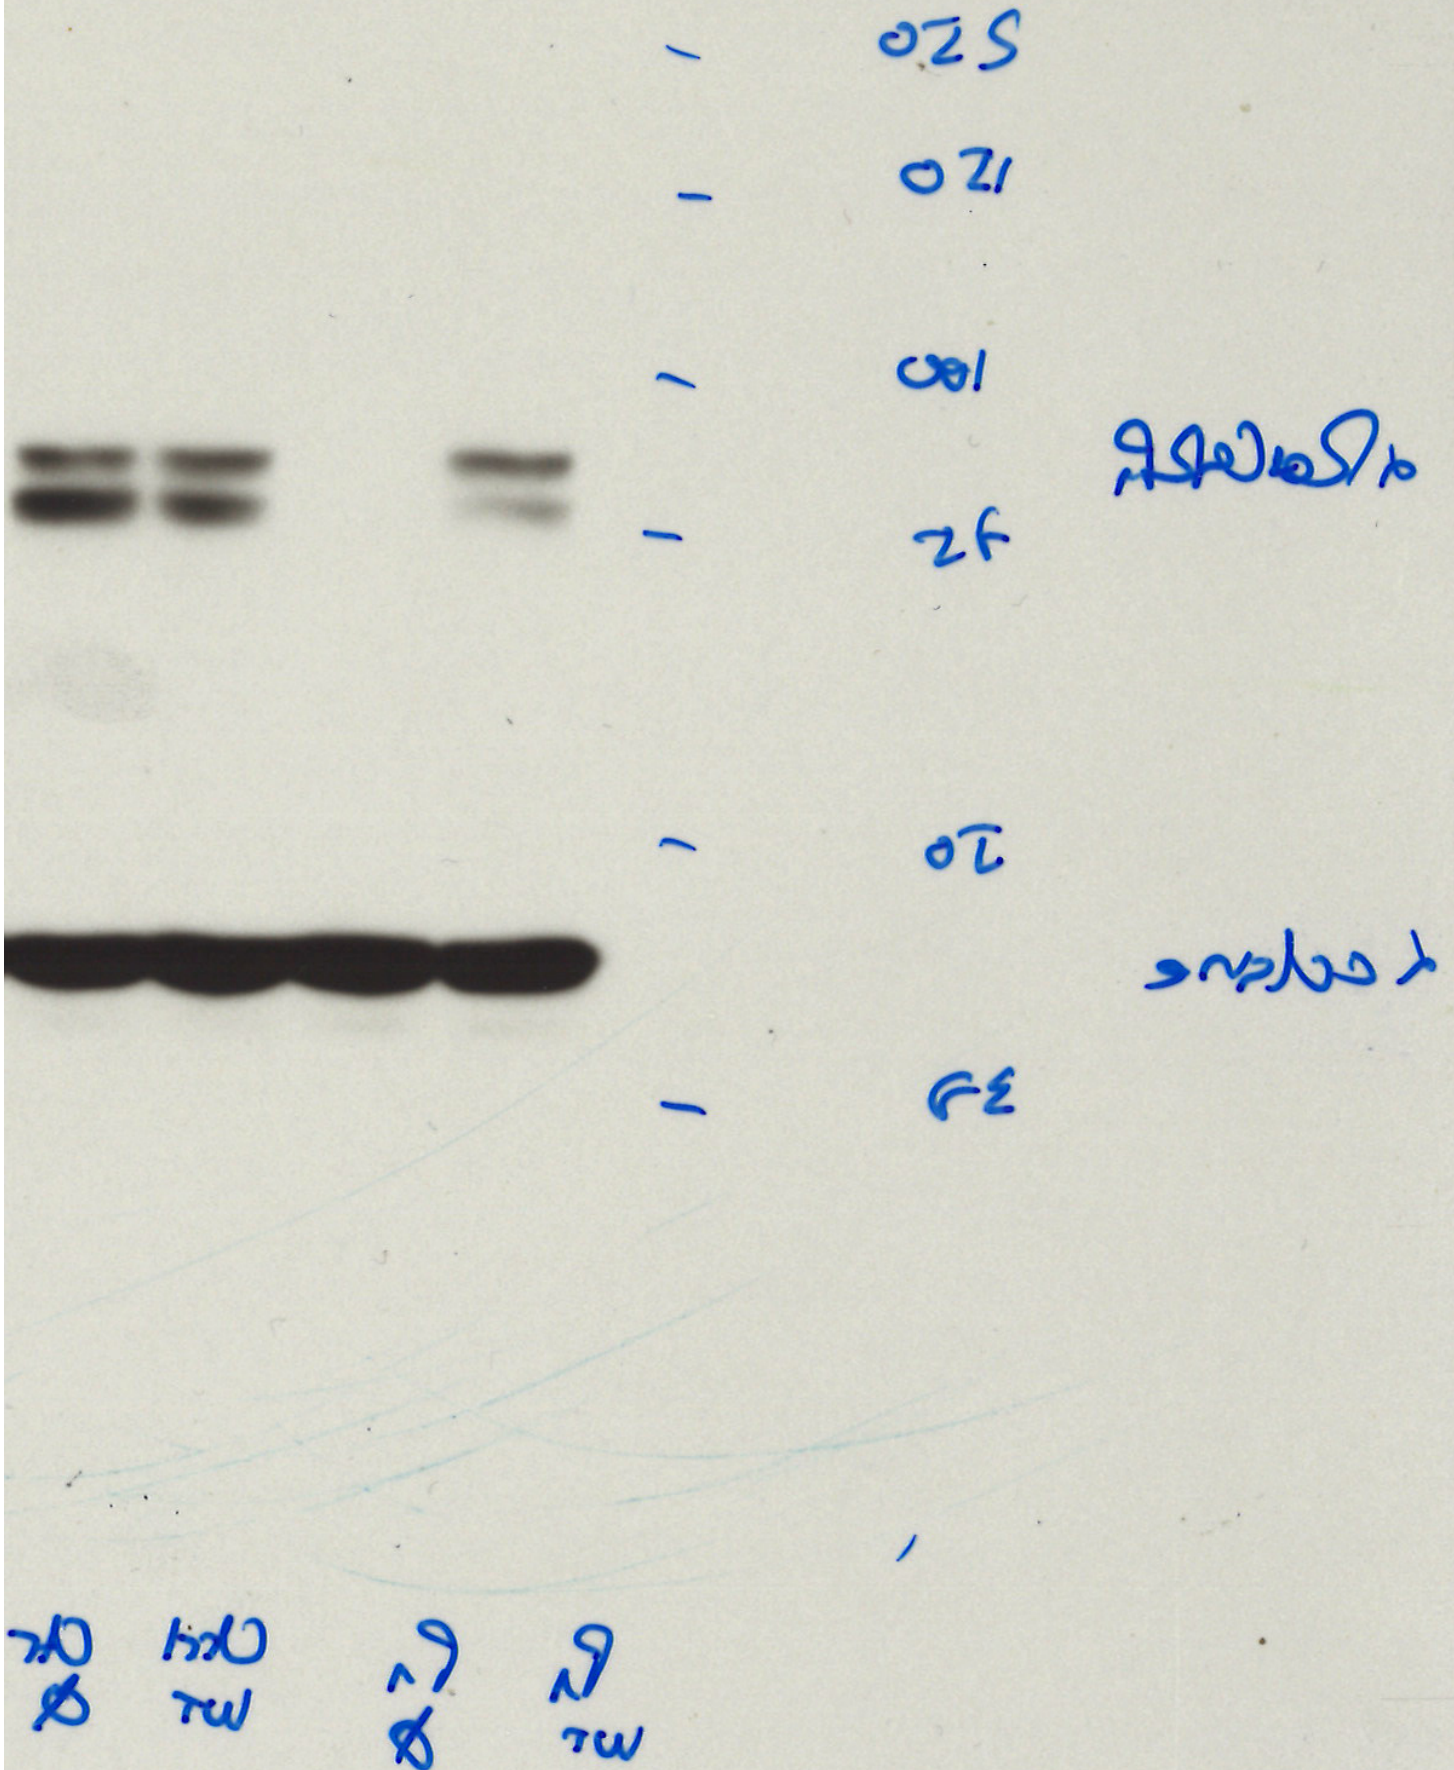

Supplement: EMMM-10-188-s005.pdf [file EMMM-10-188-s005.pdf]
